# Supplementary material for: Knockdown of SALL4 inhibits the proliferation, migration, and invasion of human lung cancer cells in vivo and in vitro
Source: PubMed Central journal article supplement — Ann Transl Med. 2020 Dec;8(24):1678. doi: 10.21037/atm-20-7939 (PMC7812191; doi:10.21037/atm-20-7939), 2020-12
Supplement: atm-08-24-1678-dss.pdf [file atm-08-24-1678-dss.pdf]

## Data Sharing Statement

|                     |                                                                                                                                                     |                                                                                                                                                            |
|---------------------|-----------------------------------------------------------------------------------------------------------------------------------------------------|------------------------------------------------------------------------------------------------------------------------------------------------------------|
| <b>Article Info</b> | <a href="http://dx.doi.org/10.21037/atm-20-7939">http://dx.doi.org/10.21037/atm-20-7939</a>                                                         |                                                                                                                                                            |
| <b>Item</b>         | <b>Question</b>                                                                                                                                     | <b>Authors' Response<br/>(place "-" if not applicable)</b>                                                                                                 |
| 1                   | Would you like to share data collected for your study to others?                                                                                    | Yes.                                                                                                                                                       |
| 2                   | If not, would you like to share the reason for your decision?                                                                                       | -                                                                                                                                                          |
| 3                   | What data in particular will be shared?                                                                                                             | Data from both cell and mouse experiments can be shared.                                                                                                   |
| 4                   | Any other documents will be shared? Such as study protocol, statistical analysis plan, informed consent form, clinical study report, analytic code. | Study protocol and statistical analysis plan will be shared.                                                                                               |
| 5                   | When will data availability begin?                                                                                                                  | From the publication date.                                                                                                                                 |
| 6                   | When will data availability end?                                                                                                                    | Two years within the publication date, since the technique may be updated over time.                                                                       |
| 7                   | To whom will you share the data?                                                                                                                    | Researchers interested in the expression of SALL4 in lung cancer and its regulation of the biological function of lung cancer cells at the cellular level. |
| 8                   | For what type of analysis or purpose?                                                                                                               | It was used to study the biological function and mechanism of SALL4 regulating lung cancer cells at the cellular level.                                    |
| 9                   | How or where can the data/documents be obtained?                                                                                                    | Emails could be sent to the address below to obtain the shared data: Ouzhiyan2017@sina.com                                                                 |
| 10                  | Any other restrictions?                                                                                                                             | We may balance the potential benefits and risks for each request and then provide the data that could be shared.                                           |
